# Higher virulence of COVID-19 in the air-polluted regions of eight severely affected countries

Riccardo Pansini<sup>1,2,3</sup> & Davide Fornacca<sup>1,4</sup>

<sup>1</sup> Institute of Eastern-Himalaya Biodiversity Research, Dali University, Yunnan, China

<sup>2</sup> Behavioral and Experimental Economics Research Center, Statistic and Mathematics College, Yunnan University of Finance and Economics, Kunming, China

<sup>3</sup> Department of Economics and Finance, Global Research Unit, City University of Hong Kong

<sup>4</sup> Institute for Environmental Sciences, University of Geneva, Switzerland

[r.pansini@gmail.com](mailto:r.pansini@gmail.com) [fornacca@eastern-himalaya.cn](mailto:fornacca@eastern-himalaya.cn)

**Abstract** – COVID-19 has spread in all continents in a span of just over three months, escalating into a pandemic that poses several humanitarian as well as scientific challenges. We here investigated the geographical character of the infection and correlate it with several annual satellite and ground indexes of air quality in China, Iran, Italy, Spain, France, Germany, U.K. and U.S.A. Adjusting for population size, we find more viral infections in those areas afflicted by high PM 2.5 and Nitrogen Dioxide values. Higher mortality was also correlated with relatively poor air quality. In Italy, the correspondence between the Po valley pollution and SARS-CoV-2 infections and induced mortality was the starkest, originating right in the most polluted European area. Air pollution appears to be for this disease a risk factor similar to smoking. This suggests the detrimental impact climate change will have on the trajectory of future respiratory epidemics.

**Keywords:** air pollution; COVID-19; coronavirus; virulence; risk factor; satellite air quality.

**Significance** – We found a significant correlation between levels of air quality and COVID-19 spread and mortality in eight countries severely affected by the respiratory illness. Despite the infection being still ongoing at a global level, these correlations are relatively robust and were calculated per capita. Living in an area with low air quality turns out to be a risk factor for becoming infected and dying from this new form of coronavirus.

## Introduction

From the first detected **outbreak** of a new member of the coronavirus (CoV) family<sup>1</sup> in Wuhan, Hubei Province, China<sup>2-4</sup>, SARS-CoV-2<sup>5</sup> has rapidly spread around the world<sup>6</sup>, with governments and institutions showing mixed results in its effective containment<sup>7</sup>. Certain regions have been much more adversely impacted in terms of the rate of infections and mortality rates than others, and the full reasons for this are not yet clear. This paper shows preliminary, yet compelling evidence of a correlation between air pollution and incidence of COVID-19 in eight countries.

**Air pollution** is notoriously known to cause health problems and, in particular, respiratory diseases, to individuals exposed for longer than several days per year<sup>8-12</sup>. Moreover, pollutants in the air are significant underlying contributors to the emergence of respiratory viral infections<sup>13</sup>. In particular, PM<sub>10</sub> and PM<sub>2.5</sub> have been linked to respiratory disease hospitalisations for

pneumonia and chronic pulmonary diseases<sup>14-20</sup>. There is some further experimental evidence that emissions from diesel and coal affect the lungs, causing pathological immune response and inflammations<sup>21,22</sup>, wiping away past disputes<sup>23</sup> that only high concentrations of these gasses were needed to cause pathologies.

Airborne microorganisms can directly infect other people's mucosae or travel further into the air and onto surfaces causing delayed infections. The **particles** of several pollutants such as PMs and NO<sub>2</sub> can act as a vector for the spread and extended survival in the air of bioaerosols<sup>24-29</sup> including viruses<sup>30-34</sup>. A first hypothesis in this direction has arisen for COVID-19 in Northern Italy<sup>35,36</sup> – granted that the viral load in a flying aggregate can be enough to cause morbidity.

The strong **containment** measures adopted firstly by the Chinese government have necessarily biased the natural virus spread<sup>37-39</sup>, not allowing the virus to distribute evenly to polluted and non-polluted areas of the country. What shall be noted, though, is that its

appearance was recorded in a Chinese area affected by some of the highest air pollution in the world, and it showed a relatively high virulence there. In the case that, as in Italy<sup>40</sup>, the onset of the infection went undetected for weeks before the outbreaks became apparent, air pollution might have played a more relevant role in the exacerbation of the virus.

A number of personal risk factors (discussed in S.I.) including male gender and being a smoker have been associated with higher morbidity and mortality of COVID-19<sup>41</sup>. A high **population density** boosts the virus spread, but by itself it should not be a reliable predictor for a higher virulence and a higher mortality<sup>42</sup>. Another evident predictor variable is **transportation**. The surrounding areas of transport hubs such as airports and large train stations should witness the appearance of the virus earlier than other zones increasing its transmission<sup>43-45,37,46</sup>.

One factor that has so far been overlooked is the role of **air pollution** in the spread and mortality rates of COVID-19. Air pollution has been shown to be strongly associated with a high incidence of other respiratory infections<sup>14,15,8,16,17,13,12,18-20</sup> and higher mortality rates<sup>10,11</sup>. Here we investigate whether there is a correlation between air pollution and air-borne SARS-CoV-2 causing respiratory diseases in China, Iran, Italy<sup>47</sup>, the United States, Spain, France, Germany, and the United Kingdom. Our **hypotheses** were:

Hyp 1: Is there a higher incidence of COVID-19 in areas with poorer air quality?

Hyp 2: Is there a higher COVID-19 mortality rate in highly polluted areas?

## Methods

We selected eight countries particularly affected by the virus and evaluated the potential correlation between air quality metrics and infections at the finest granularity available. Results for each country were analysed separately. (More on this in S.I.)

### Data collection

The COVID-19 dataset was compiled at the second-level administrative subdivision for six out of eight countries (U.S. counties equivalent); however, a few exceptions occurred and, in some cases, adaptations were required.

Both infections and deaths due to COVID-19 were collected and normalised by population

size (100,000 residents).

Air quality information was retrieved mainly from satellite observations and for the U.S.A., China and Italy, we included ground measures from different sources. Satellite data hold several advantages over ground station data, such as regular and continuous data acquisition, quasi-global coverage, and spatially consistent measurement methodologies. On the other hand, ground stations offer real measures of single pollutants instead of deriving it from spectral information (satellites), however, they require more or less arbitrary estimations (such as interpolation) to fill spatial gaps.

Table S1 in S.I. summarises the datasets used.

### Data Analysis

Exploratory analysis of the variables was conducted with a focus on evaluating the air pollution distributions within each country. Due to the highly skewed distributions of both population-adjusted dependent variables, namely COVID-19 infections / 100,000 inhabitants and COVID-19 deaths / 100,000 inhabitants, the assumption of normality was not met. We therefore opted for the Kendall tau correlation coefficient for all statistical tests.

Finally, thematic maps were produced for visual interpretation to better highlight the potential air quality and COVID-19 distributions within the eight assessed countries.

## Results

### Correlation between air pollution variables with COVID-19 infections and mortality

Significant positive correlations between COVID-19 infections and air quality variables were found in China, the U.S.A., Italy, Iran, France, and the U.K., but not in Spain and Germany. The latter showed a weak negative correlation. (Table 1 and 2). The strongest correlations were found in Italy, both for infections and deaths, while population size and densities did not explain COVID-19 incidence. In China, population densities showed a similar positive correlation with the virus infections and deaths than air pollution, while in the U.S.A. and U.K. population density has a stronger correlation than air pollution variables. Despite its small sample size ( $df = 29$ ), Iran shows a significant correlation with NO<sub>2</sub> distribution and no incidence from population variables. The results for Spain and Germany showed different

patterns. The spread of COVID-19 and its related fatalities in Spain could not be explained by differences in air pollution; however, population size and density were negatively correlated with the virus. In a distinct manner, population density explained weakly COVID-19 cases and deaths in Germany while the distribution of fine particulate matter was

negatively correlated weakly. Among the different pollutant analysed, O<sub>3</sub> and SO<sub>2</sub> measures from ground stations in China and the United States did not show significant correlation with COVID-19 or were negatively correlated, in contrast with the other pollutants.

| Infections          | China |                  | U.S.A. |                   | Italy (provinces) |           | Iran  |           | Spain |                   | Germany |                  | U.K.  |            |
|---------------------|-------|------------------|--------|-------------------|-------------------|-----------|-------|-----------|-------|-------------------|---------|------------------|-------|------------|
|                     | df    | p-               | df     | p-                | df                | p-        | df    | p-        | df    | p-                | df      | p-               | df    | p-         |
|                     | (N-2) | tau value        | (N-2)  | tau value         | (N-2)             | tau value | (N-2) | tau value | (N-2) | tau value         | (N-2)   | tau value        | (N-2) | tau value  |
| pop                 | 337   | .23 <.001        | 3102   | .34 <.001         | 105               | .00 0.942 | 29    | -.15 0.25 | 44    | -.26 <b>0.01</b>  | 399     | .03 0.311        | 196   | -.01 0.846 |
| pop dens            | 337   | .32 <.001        | 3102   | .34 <.001         | 105               | .11 0.094 | 29    | .14 0.279 | 44    | -.31 <b>0.003</b> | 399     | .09 <b>0.006</b> | 196   | .35 <.001  |
| PM 2.5 sat          | 337   | .28 <.001        | 3102   | .18 <.001         | 105               | .62 <.001 | 29    | .24 0.061 | 44    | .04 0.726         | 399     | -.11 <.001       | 196   | .16 <.001  |
| NO <sub>2</sub> sat | 337   | .24 <.001        | 3101   | .21 <.001         | 105               | .54 <.001 | 29    | .40 <.001 | 44    | .13 0.188         | 399     | -.03 0.313       | 194   | .22 <.001  |
| PM 2.5 gr           | 302   | .15 <.001        | 427    | .13 <.001         | 88                | .30 <.001 |       |           |       |                   |         |                  |       |            |
| PM 10 gr            | 302   | .04 0.33         | 201    | .10 <b>0.033</b>  | 99                | .10 0.129 |       |           |       |                   |         |                  |       |            |
| CO gr               | 302   | -.01 0.84        | 156    | .14 <b>0.007</b>  |                   |           |       |           |       |                   |         |                  |       |            |
| NO <sub>2</sub> gr  | 302   | .12 <b>0.002</b> | 246    | .35 <.001         |                   |           |       |           |       |                   |         |                  |       |            |
| O <sub>3</sub> gr   | 302   | -.03 0.477       | 749    | -.04 0.147        |                   |           |       |           |       |                   |         |                  |       |            |
| SO <sub>2</sub> gr  | 302   | -.01 0.843       | 314    | -.12 <b>0.002</b> |                   |           |       |           |       |                   |         |                  |       |            |

Table 1 Correlation coefficients between COVID-19 cases per 100,000 inhabitants and air quality variables. Significant correlations ( $p$ -value < 0.05) are shown in bold; blue and red colour highlights indicate positive and negative correlations, respectively.

| Fatalities          | China |                  | U.S.A. |                   | Italy (regions) |                  | France |                  | Spain |                   | Germany |                   | U.K.  |                  |
|---------------------|-------|------------------|--------|-------------------|-----------------|------------------|--------|------------------|-------|-------------------|---------|-------------------|-------|------------------|
|                     | df    | p-               | df     | p-                | df              | p-               | df     | p-               | df    | p-                | df      | p-                | df    | p-               |
|                     | (N-2) | tau value        | (N-2)  | tau value         | (N-2)           | tau value        | (N-2)  | tau value        | (N-2) | tau value         | (N-2)   | tau value         | (N-2) | tau value        |
| pop                 | 337   | .17 <.001        | 3102   | .36 <.001         | 19              | -.06 0.743       | 94     | .21 <b>0.003</b> | 44    | -.26 <b>0.012</b> | 399     | .06 0.094         | 196   | .11 <b>0.022</b> |
| pop dens            | 337   | .16 <.001        | 3102   | .35 <.001         | 19              | .10 0.571        | 94     | .27 <.001        | 44    | -.36 <.001        | 399     | .04 0.193         | 196   | .46 <.001        |
| cases 100k          | 337   | .39 <.001        | 3102   | .45 <.001         | 19              | .87 <.001        | .      | .                | 44    | .81 <.001         | 399     | .56 <.001         | 196   | .56 <.001        |
| PM 2.5 sat          | 337   | .18 <.001        | 3102   | .15 <.001         | 19              | .61 <.001        | 94     | .50 <.001        | 44    | -.02 .842         | 399     | -.07 <b>0.037</b> | 196   | .36 <.001        |
| NO <sub>2</sub> sat | 337   | .16 <.001        | 3101   | .23 <.001         | 19              | .49 <b>0.002</b> | 94     | .52 <.001        | 44    | .11 .268          | 399     | -.06 .055         | 194   | .41 <.001        |
| PM 2.5 gr           | 302   | .18 <.001        | 427    | .21 <.001         | 17              | .20 0.234        |        |                  |       |                   |         |                   |       |                  |
| PM 10 gr            | 302   | .12 <b>0.006</b> | 201    | .19 <.001         | 19              | -.05 0.788       |        |                  |       |                   |         |                   |       |                  |
| CO gr               | 302   | .11 <b>0.012</b> | 156    | .25 <.001         |                 |                  |        |                  |       |                   |         |                   |       |                  |
| NO <sub>2</sub> gr  | 302   | .12 <b>0.005</b> | 246    | .41 <.001         |                 |                  |        |                  |       |                   |         |                   |       |                  |
| O <sub>3</sub> gr   | 302   | -.02 0.585       | 749    | -.05 0.051        |                 |                  |        |                  |       |                   |         |                   |       |                  |
| SO <sub>2</sub> gr  | 302   | .04 0.409        | 314    | -.08 <b>0.045</b> |                 |                  |        |                  |       |                   |         |                   |       |                  |

Table 2 Correlation coefficients between COVID-19 deaths per 100,000 inhabitants and air quality variables. Significant correlations ( $p$ -value < 0.05) are shown in bold; blue and red colour highlights indicate positive and negative correlations, respectively.

### Correlational plots

Graph 1 reports correlational plots of COVID-

19 fatalities with the satellite-based PM 2.5 concentrations for seven countries except the missing fatalities of Iran.

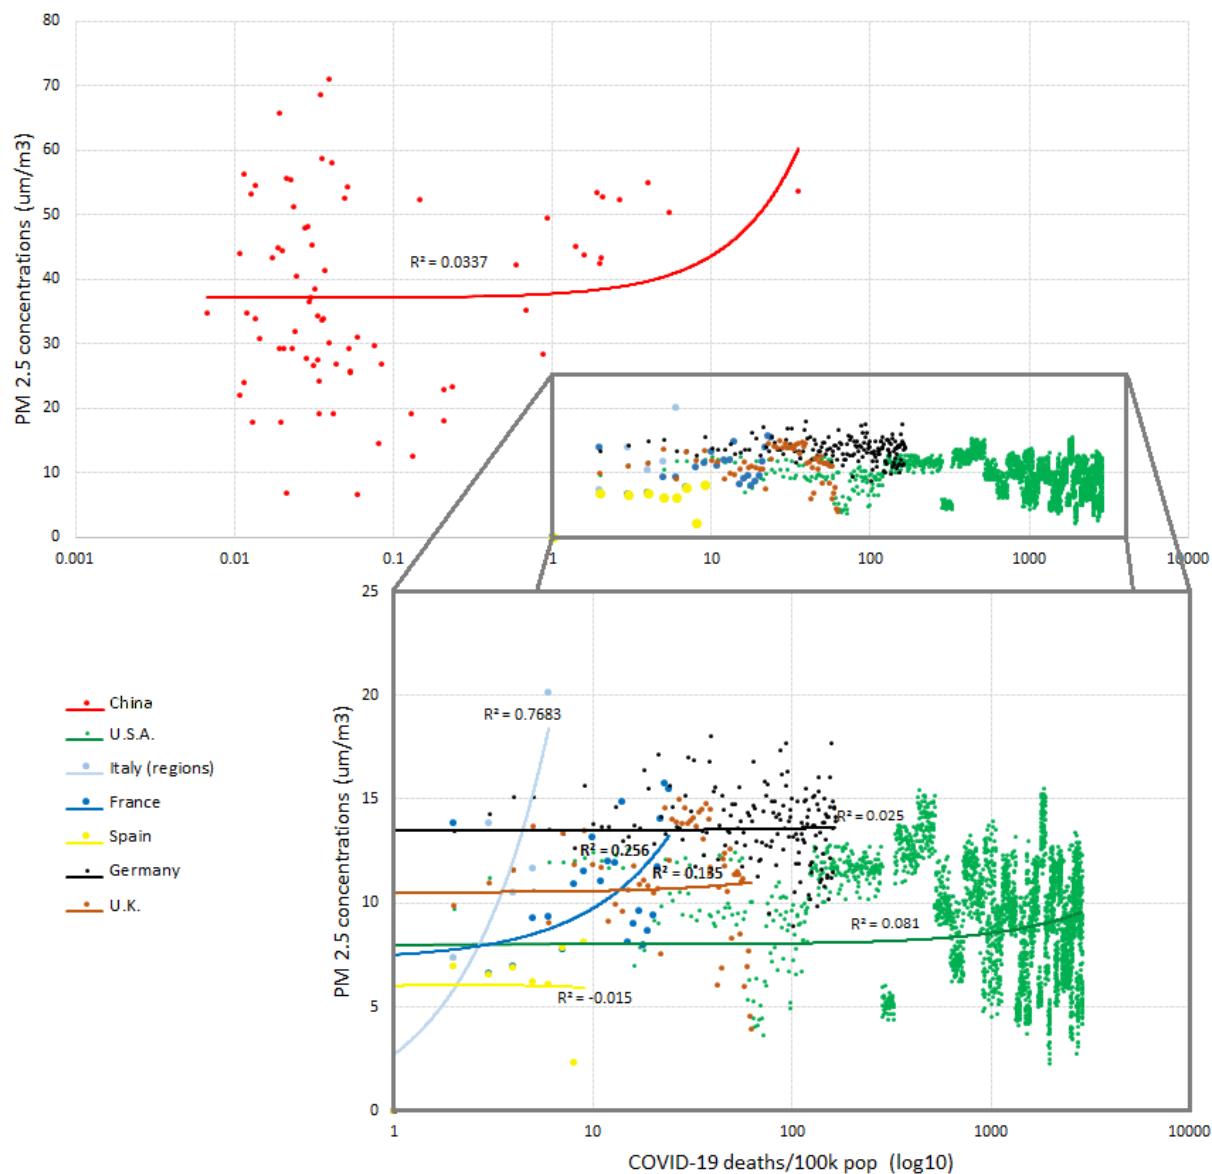

Graph 1 - Correlational plots of COVID-19 fatalities with the satellite-based PM 2.5 concentrations for seven countries except the missing fatalities of Iran. The countries should not be compared in respect to mortality rate due to different administration sizes.

### COVID-19 cases and air quality maps

Figure 1 reports comparison maps of COVID-19 distributions with the satellite-based PM 2.5 concentrations for the eight analysed countries. These graphical representations also allow a rapid assessment of the air pollution pattern in each country (basic descriptive statistics for each pollutant can be found in S.I., Table S2). While the PM 2.5 maps are continuous surfaces drawn following the same classification scheme across countries, the COVID-19 infections and deaths maps required ad-hoc classification adaptations due to different population profiles and infection dynamics. In China, due to the very large population and an apparently effective

policy for the containment of the virus, the number of cases per 100,000 residents were relatively low and highly concentrated in the epicentre of the outbreak (Wuhan and the Hubei province). A visual correlation between the two maps can be perceived, especially between the eastern and western parts of the country. In the United States, due to a higher correlation with PM 2.5, we chose to represent COVID-19 deaths instead of cases. Here the virus noticeably appears spread over several areas. PM 2.5 differences are not large, but their distribution looks adequately coincident with the fatalities. The high correlation results found for Italy are clearly visible. The polluted areas of the Po valley are those heavily affected by COVID-19

infections. While in Iran and France the correlations are only lightly perceivable, the maps of Spain confirm the results in Table 1 and 2, going against our general hypotheses. Moreover, PM 2.5 levels in Spain are minimal. The U.K. map of PM 2.5 shows well the higher concentrations around urban areas and the overall south-eastern area where COVID-19 cases are mostly found too. However, also a few

counties/NHS in the centre are particularly affected by the virus infections. Finally, COVID-19 cases in Germany are concentrated in the southern and western districts, while PM 2.5 concentrations are higher in the eastern districts, giving a negative correlation.

### P. R. of China

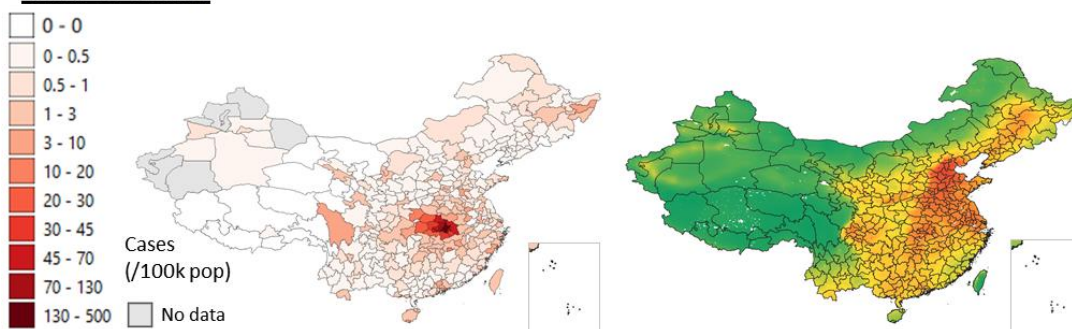

### United States of America

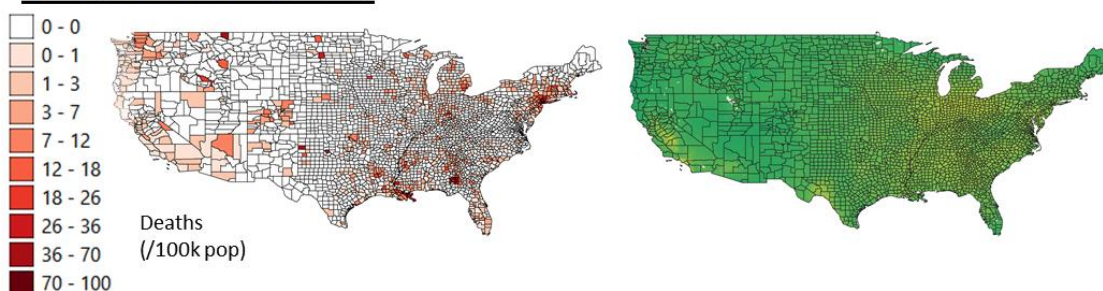

### United Kingdom

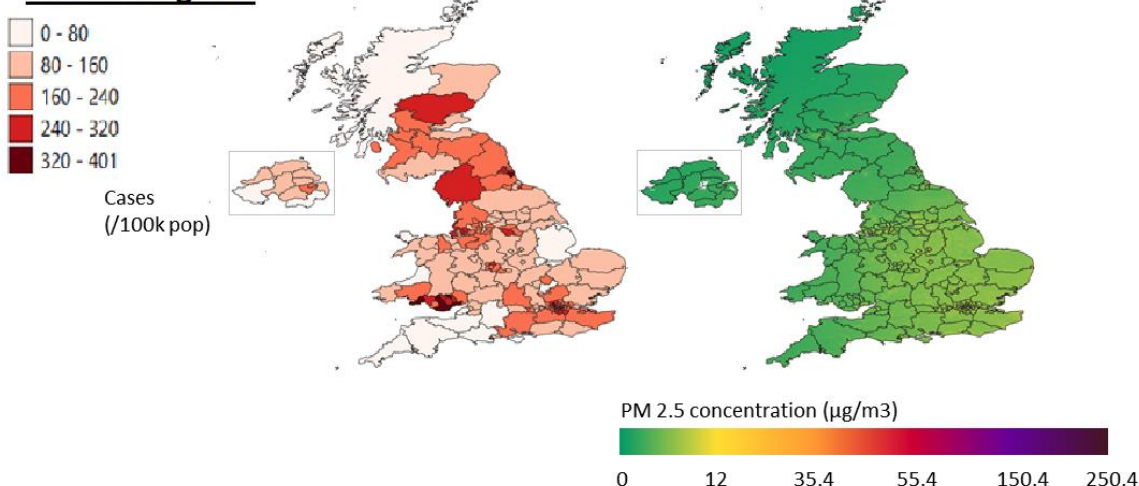

Figure 1 Maps comparisons of satellite-derived PM 2.5 distributions and COVID-19 cases or deaths (per 100,000 inhabitants) in eight countries. From top to bottom: China, Conterminous U.S.A., U.K., Italy, Iran, France (excluding overseas territories), Spain, and Germany. Maps of different countries are not at the same scale and cannot be compared, due to the different colour thresholds. Administrative units' boundaries are adapted to the COVID-19 data available (e.g. merged districts of Galicia in Spain).

### Italy

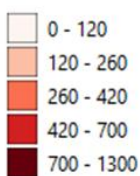

Cases  
(/100k pop)

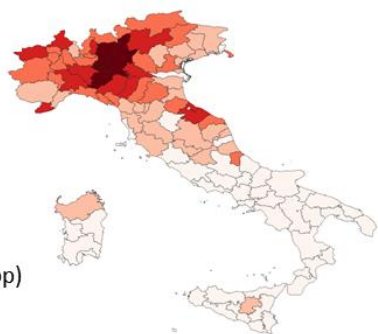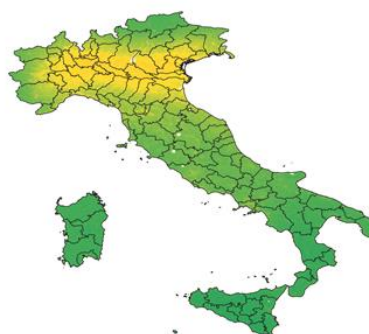

### Iran

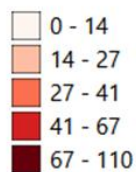

Cases  
(/100k pop)

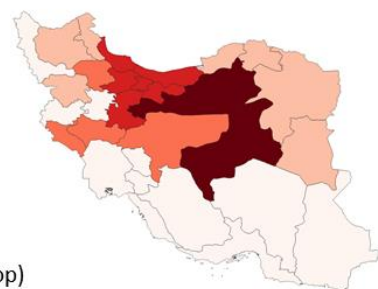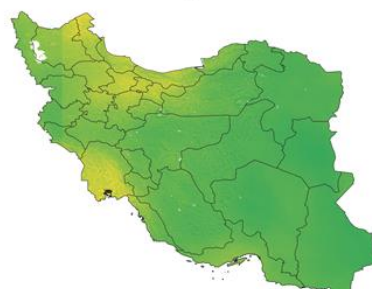

### France

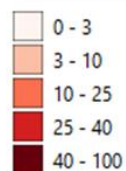

Deaths  
(/100k pop)

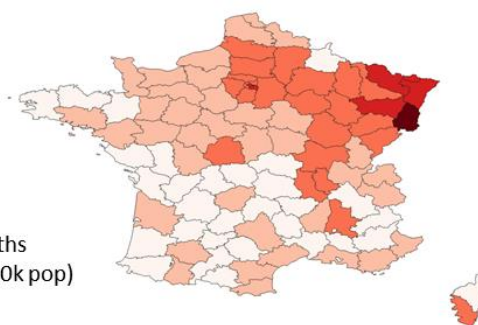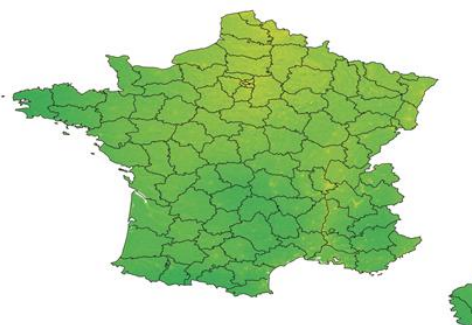

### Spain

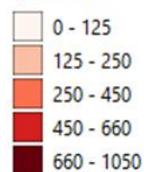

Cases  
(/100k pop)

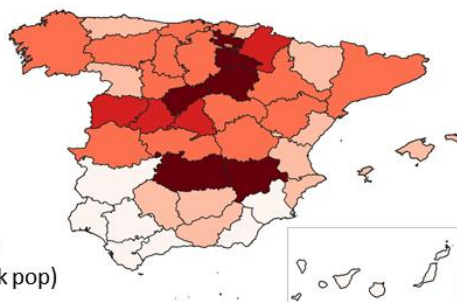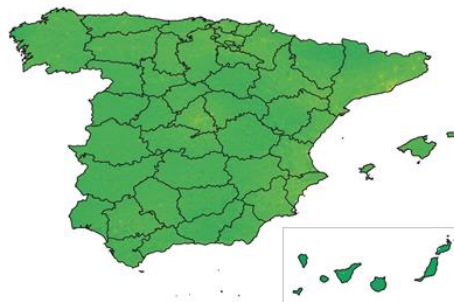

### Germany

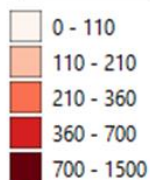

Cases  
(/100k pop)

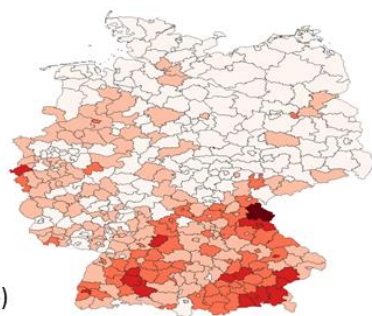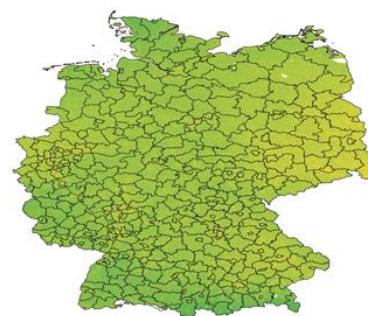

PM 2.5 concentration ( $\mu\text{g}/\text{m}^3$ )

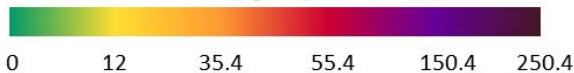

## Discussion

This study is the first to investigate air pollution for eight countries as a potential risk factor for the incidence and mortality rates of COVID-19. It provides preliminary evidence that SARS-CoV-2 infections are most often found in highly polluted areas regardless of population density. In addition, in these areas affected by low air quality, the virus kills more often than elsewhere.

The interpretation of these findings has to be necessary **cautious**, as the virus spread in most of the countries is still ongoing<sup>48</sup> and is being contained<sup>40</sup>. There are also confounding factors such as how the virus infection was determined in patients by different countries. However, the larger the geographical areas are affected by the pandemic, the lower these elements play a role.

Accounting for these preliminary caveats, by controlling for the number of infections per 100,000 inhabitants, **we found** statistically significant, positive correlations between COVID-19 infections and low air quality in six out of eight assessed countries, despite varying population densities. Infected people were more likely to die in the Chinese, Italian, American, Iranian, French, and British areas with poor air quality. The absence of correlation found in Spain may be attributed to the minimal difference of average PM 2.5 and NO<sub>2</sub> levels among its provinces (S. I. Table S1). Despite these small variations, air pollution appears to be correlated with population density (S. I. Table S2), while COVID-19 had a higher incidence in less populated areas (Table 2 and 3). One hypothesis of this particular configuration could be an effect of the people's reaction to the spread of the virus. In fact, it was reported that a high number of residents of big cities quickly moved to the countryside areas, favouring the spread of the virus in rural areas.

In China, in Hubei province, **brand** new time analyses give preliminary evidence of a correlation between high levels of NO<sub>2</sub> and 12-day delayed virus outbreaks<sup>49</sup> and other PM covariates<sup>50,51</sup>. In the U.S.A., levels of PM2.5 have just been found responsible for 20-time higher mortality rate by COVID-19, a rate much higher than other demographic co-variables<sup>52</sup>.

We found that in **Italy**, the correspondence between poor air quality and SARS-CoV-2 appearance and its induced mortality was the starkest. The area with the largest number of infections and deaths in Italy is the Po Valley,

which is also the foremost place of polluted air in Europe<sup>53</sup>. This result was also confirmed by another preliminary study which included other demographic co-variables<sup>54</sup>. It should be noted that the Italian higher mortality than the one predicted from mathematical modelling is unlikely caused by genetic mutations of the virus<sup>55</sup>. Therefore, other factors must be attributed to such a stronger virulence.

We run these analyses considering eight countries in their second-order administrations' level. If controlling for several **other predictors** like demographic variables is something advisable to perform at a single-country level, including them at an international scale poses an apparent technical limitation. National or federal health systems have different capacities and provide care in their distinct ways. This in turn influences case detections, intensive care capacity and fatality rates. Cofactors such as earliest location of pathogen, population mobility and patient socioeconomic status or ethnicity may not be accounted reliably between such diverse countries like China and the United States, even when included as random factors as in a comprehensive generalized mixed model, because they are interdependent and only in part nested within countries or administrations. Yet the epidemics, which has turned into a pandemic, might have catered for this limitation; the larger its extent, the more prominent a common factor like air pollution may become, while other secondary predictors will level out across places.

**Satellite NO<sub>2</sub> and PM 2.5** on their own are suitable representatives for general air quality<sup>56</sup>, since they are more consistent than ground station data, providing finer detail, consistency, accuracy, with virtually no errors of counterfeits. Despite limited by cloud cover, they are to a certain extent less prone to biases from other conditions<sup>57</sup> of wind and greenhouse effect of temperature inversion, in turn also related to air pollution. In spite of this, we found some consistency between ground and satellite data for those countries for which we could obtain fine-grained ground measures. The satellite databases employed in this study represent annual means which we further averaged over the full time-series. This only partially represents the real emission of pollutants during the year and do not make evident seasonal variations and other fluctuations. However, our aim was to highlight differences in air quality within a country's region and show the correlation with

the virus. Therefore, threshold values of air pollution cannot be inferred from this study.

Since there is now some first evidence that the cross of the virus from animals to humans may have happened years earlier than the end of 2019 in the Chinese city of Wuhan<sup>58</sup>, we can speculate that air pollution could have played a role in gradually **exacerbating morbidity and mortality**, mutating the virus from an initial evolutionary stage not causing any more serious morbidity than a cold, to becoming so threatening to humans. Also, its detection in Italy could be the result of an exacerbation of the European import which drifted for some time<sup>59</sup> before expressing its strong viral lineages in the most polluted region of the continent.

In the unlikely case that the figures provided by the states in relation to the number of infections and deaths are inaccurate<sup>60</sup>, our analyses and conclusions would not need to be reframed. If that is the case, this error will most likely be concentrated in just one or very few administrations and it would not affect our very large correlational dataset.

States have responded by trying to mitigate the spread of the virus through imposing widespread lockdowns. This has led to a **decrease in air pollution**, which in China likely prevented the deaths of 4,000 children under 5 and 73,000 adults over 70<sup>61</sup>. However, the winter months and low temperature caused people to keep at least domestic heating systems on,

maintaining a certain amount of emissions. In Europe<sup>62</sup> and in China<sup>63</sup> a consistent reduction in air pollution was recorded by satellites due to reduced anthropogenic activities during the lockdowns, although it occurred gradually<sup>64,65</sup>, also due to weather conditions unfavourable to air quality. The quarantines certainly decreased the role that **commuting** has in the virus spread. Nonetheless, reduced anthropogenic activities and reduced mobility lose correlational significance over time, after the first stages of the infection<sup>37</sup>. Instead, the correlation we found with low air quality remains significant throughout the different epidemic stages.

This pandemic has not ended yet, so our conclusions are necessarily restricted to the stage of infection of those eight countries. **Further research** in the field of physics should be endorsed to investigate the capacity of air pollutants to act as viral vectors. Air pollutants may in fact act as a medium for the aerial transport of SARS-CoV-2<sup>35,36</sup>, potentially broadening the harm done in the contagions.

Our results inform epidemiologists on how to prevent future, possibly more lethal viral outbreaks by curbing air pollution and climate change. Institutions need to endorse such **interventions** more seriously<sup>66</sup> together with endorsing collateral and more comprehensive measures playing a role in reducing these epidemics, such as impeding biodiversity loss<sup>67</sup>, ending wars, and alleviating poverty<sup>68</sup>.

## Author Contributions

Concept and design: RP.

Acquisition, analysis and interpretation of data: DF.

Statistical analysis: DF.

Drafting of the manuscript: RP.

Critical revision of the manuscript for important intellectual content: RP and DF.

## Acknowledgements

Lei Shi and Xiao Wen commented on the study. Livia Ottisova improved and revised the manuscript. Chen Chun and Michele Mignini commented on statistics. Rafael Moreno Ripoll and Mehrdad Samavati helped to obtain the data for Spain and Iran. RP did this work while in self-isolation due to the current pandemic.

## Data Availability

The data are available at <https://github.com/DavideFornacca/COVID19>.



## References

- 1 Cui, J., Li, F. & Shi, Z.-L. 2019. Origin and evolution of pathogenic coronaviruses. *Nature Reviews Microbiology*, 17, 181-192, 10.1038/s41579-018-0118-9.
- 2 Perlman, S. 2020. Another decade, another coronavirus. *N Engl J Med*, 382, 760-762, 10.1056/NEJMe2001126.
- 3 WHO. 2020. Pneumonia of unknown cause – China. Access date: 21/04/2020, <https://www.who.int/csr/don/05-january-2020-pneumonia-of-unknown-cause-china/en/>.
- 4 Zhu, N., Zhang, D., Wang, W., Li, X., Yang, B., Song, J., Zhao, X., Huang, B., Shi, W. & Lu, R. J. N. E. J. o. M. 2020. A novel coronavirus from patients with pneumonia in China, 2019. *N Engl J Med*, 382, 727-733, 10.1056/NEJMoa2001017.
- 5 Wu, F., Zhao, S., Yu, B., Chen, Y.-M., Wang, W., Song, Z.-G., Hu, Y., Tao, Z.-W., Tian, J.-H., Pei, Y.-Y., Yuan, M.-L., Zhang, Y.-L., Dai, F.-H., Liu, Y., Wang, Q.-M., Zheng, J.-J., Xu, L., Holmes, E. C. & Zhang, Y.-Z. 2020. A new coronavirus associated with human respiratory disease in China. *Nature*, 579, 265-269, 10.1038/s41586-020-2008-3.
- 6 Mattiuzzi, C. & Lippi, G. 2020. Which lessons shall we learn from the 2019 novel coronavirus outbreak? *Annals of translational medicine*, 8, 48-48, 10.21037/atm.2020.02.06.
- 7 McCloskey, B. & Heymann, D. L. 2020. SARS to novel coronavirus - old lessons and new lessons. *Epidemiology and infection*, 148, e22-e22, 10.1017/S0950268820000254.
- 8 Di, Q., Wang, Y., Zanobetti, A., Wang, Y., Koutrakis, P., Choirat, C., Dominici, F. & Schwartz, J. D. 2017. Air pollution and mortality in the Medicare population. *New England Journal of Medicine*, 376, 2513-2522.
- 9 Ebenstein, A., Fan, M., Greenstone, M., He, G. & Zhou, M. 2017. New evidence on the impact of sustained exposure to air pollution on life expectancy from China's Huai River Policy. *Proceedings of the National Academy of Sciences*, 114, 10384, 10.1073/pnas.1616784114.
- 10 Krewski, D. 2009. Evaluating the effects of ambient air pollution on life expectancy. *N Engl J Med*, 360, 413-415, 10.1056/NEJMe0809178.
- 11 Lelieveld, J., Evans, J. S., Fnais, M., Giannadaki, D. & Pozzer, A. 2015. The contribution of outdoor air pollution sources to premature mortality on a global scale. *Nature*, 525, 367-371.
- 12 Tager, I. 2005. Chronic Exposure and Susceptibility to Oxidant Air Pollutants. In: *Lung Biology In Health Disease* (Ed. by W. M. Foster & D. L. Costa), pp. 259
- 13 Silva, D. R., Viana, V. P., Müller, A. M., Livi, F. P., Dalcin, P. & R, d. T. 2014. Respiratory viral infections and effects of meteorological parameters and air pollution in adults with respiratory symptoms admitted to the emergency room. *Influenza and other respiratory viruses*, 8, 42-52.
- 14 Bayram, H., Sapsford, R. J., Abdelaziz, M. M. & Khair, O. A. 2001. Effect of ozone and nitrogen dioxide on the release of proinflammatory mediators from bronchial epithelial cells of nonatopic nonasthmatic subjects and atopic asthmatic patients in vitro. *Journal of Allergy and Clinical Immunology*, 107, 287-294.
- 15 Cipolla, M., Sorgenti, M., Gentile, C. & Bishara, M. M. 2018. Air Pollution and Lung Diseases. In: *Clinical Handbook of Air Pollution-Related Diseases*, pp. 327-339: Springer
- 16 Johannson, K. A., Vittinghoff, E., Lee, K., Balmes, J. R., Ji, W., Kaplan, G. G., Kim, D. S. & Collard, H. R. 2014. Acute exacerbation of idiopathic pulmonary fibrosis associated with air pollution exposure. *European Respiratory Journal*, 43, 1124-1131.
- 17 Ko, F. W., Tam, W., Wong, T. W., Chan, D. P., Tung, A. H., Lai, C. K. & Hui, D. S. 2007. Temporal relationship between air pollutants and hospital admissions for chronic obstructive pulmonary disease in Hong Kong. *Thorax*, 62, 780-785.
- 18 Thillai, M., Moller, D. R. & Meyer, K. C. 2017. *Clinical Handbook of Interstitial Lung Disease*: CRC Press
- 19 Zhang, Y., Ding, Z., Xiang, Q., Wang, W., Huang, L. & Mao, F. 2020. Short-term effects of ambient PM1 and PM2.5 air pollution on hospital admission for respiratory diseases: Case-

- crossover evidence from Shenzhen, China. *Int J Hyg Environ Health*, 224, 113418, 10.1016/j.ijheh.2019.11.001.
- 20 Zhang, Y., Wang, S. G., Xia, Y., Shang, K. Z., Cheng, Y. F., Xu, L., Ning, G. C., Zhao, W. J. & LI, N. R. 2015. Association between ambient air pollution and hospital emergency admissions for respiratory and cardiovascular diseases in Beijing: a time series study. *J Biomedical Environmental Sciences*, 28, 352-363.
- 21 Harrod, K. S., Jaramillo, R. J., Rosenberger, C. L., Wang, S. Z., Berger, J. A., McDonald, J. D. & Reed, M. D. 2003. Increased susceptibility to RSV infection by exposure to inhaled diesel engine emissions. *Am J Respir Cell Mol Biol*, 28, 451-463, 10.1165/rcmb.2002-0100OC.
- 22 Lambert, A. L., Mangum, J. B., DeLorme, M. P. & Everitt, J. I. 2003. Ultrafine carbon black particles enhance respiratory syncytial virus-induced airway reactivity, pulmonary inflammation, and chemokine expression. *Toxicological Sciences*, 72, 339-346.
- 23 Chen, T.-M., Kuschner, W. G., Gokhale, J. & Shofer, S. 2007. Outdoor Air Pollution: Nitrogen Dioxide, Sulfur Dioxide, and Carbon Monoxide Health Effects. *The American Journal of the Medical Sciences*, 333, 249-256, <https://doi.org/10.1097/MAJ.0b013e31803b900f>.
- 24 Burge, H. A. 2005. Biological Airborne Pollutants. In: *Lung Biology In Health Disease* (Ed. by W. M. Foster & D. L. Costa), pp. 329
- 25 Dong, L., Qi, J., Shao, C., Zhong, X., Gao, D., Cao, W., Gao, J., Bai, R., Long, G. & Chu, C. 2016. Concentration and size distribution of total airborne microbes in hazy and foggy weather. *Science of the Total Environment*, 541, 1011-1018.
- 26 Li, Y., Fu, H., Wang, W., Liu, J., Meng, Q. & Wang, W. 2015. Characteristics of bacterial and fungal aerosols during the autumn haze days in Xi'an, China. *Atmospheric Environment*, 122, 439-447.
- 27 Smets, W., Moretti, S., Denys, S. & Lebeer, S. 2016. Airborne bacteria in the atmosphere: presence, purpose, and potential. *Atmospheric Environment*, 139, 214-221.
- 28 Wei, K., Zou, Z., Zheng, Y., Li, J., Shen, F., Wu, C.-y., Wu, Y., Hu, M. & Yao, M. 2016. Ambient bioaerosol particle dynamics observed during haze and sunny days in Beijing. *Science of the Total Environment*, 550, 751-759.
- 29 Wong, G., Ko, F., Lau, T., Li, S., Hui, D., Pang, S., Leung, R., Fok, T. & Lai, C. 2001. Temporal relationship between air pollution and hospital admissions for asthmatic children in Hong Kong. *Clinical Experimental Allergy*, 31, 565-569.
- 30 Cao, C., Jiang, W., Wang, B., Fang, J., Lang, J., Tian, G., Jiang, J. & Zhu, T. F. 2014. Inhalable microorganisms in Beijing's PM<sub>2.5</sub> and PM<sub>10</sub> pollutants during a severe smog event. *Environmental science and technology*, 48, 1499-1507.
- 31 Chen, G., Zhang, W., Li, S., Williams, G., Liu, C., Morgan, G. G., Jaakkola, J. J. & Guo, Y. 2017. Is short-term exposure to ambient fine particles associated with measles incidence in China? A multi-city study. *Environmental research*, 156, 306-311.
- 32 Chen, P.-S., Tsai, F. T., Lin, C. K., Yang, C.-Y., Chan, C.-C., Young, C.-Y. & Lee, C.-H. 2010. Ambient influenza and avian influenza virus during dust storm days and background days. *Environmental health perspectives*, 118, 1211-1216.
- 33 Peng, L., Zhao, X., Tao, Y., Mi, S., Huang, J. & Zhang, Q. 2020. The effects of air pollution and meteorological factors on measles cases in Lanzhou, China. *Environmental Science and Pollution Research*, 1-10.
- 34 Ye, Q., Fu, J.-f., Mao, J.-h. & Shang, S.-q. 2016. Haze is a risk factor contributing to the rapid spread of respiratory syncytial virus in children. *Environmental Science and Pollution Research*, 23, 20178-20185.
- 35 Contini, D. & Costabile, F. 2020. Does Air Pollution Influence COVID-19 Outbreaks? *Atmosphere*, 11, 377, 10.3390/atmos11040377.
- 36 Setti, L., Passarini, F., de Gennaro, G., Di Gilio, A., Palmisani, J., Buono, P., Fornari, G.,

- Perrone, M. G., Piazzalunga, A., Barbieri, P., Rizzo, E. & Miani, A. 2020. Evaluation of the potential relationship between Particulate Matter (PM) pollution and COVID-19 infection spread in Italy. [http://www.simaonlus.it/wpsima/wp-content/uploads/2020/03/COVID\\_19\\_position-paper\\_ENG.pdf](http://www.simaonlus.it/wpsima/wp-content/uploads/2020/03/COVID_19_position-paper_ENG.pdf).
- 37 Kraemer, M. U. G., Yang, C.-H., Gutierrez, B., Wu, C.-H., Klein, B., Pigott, D. M., du Plessis, L., Faria, N. R., Li, R., Hanage, W. P., Brownstein, J. S., Layan, M., Vespignani, A., Tian, H., Dye, C., Pybus, O. G. & Scarpino, S. V. 2020. The effect of human mobility and control measures on the COVID-19 epidemic in China. *Science*, eabb4218, 10.1126/science.abb4218.
- 38 Tobías, A. 2020. Evaluation of the lockdowns for the SARS-CoV-2 epidemic in Italy and Spain after one month follow up. *Science of the Total Environment*, 725, 138539, 10.1016/j.scitotenv.2020.138539.
- 39 Wu, J. T., Leung, K., Bushman, M., Kishore, N., Niehus, R., de Salazar, P. M., Cowling, B. J., Lipsitch, M. & Leung, G. M. 2020. Estimating clinical severity of COVID-19 from the transmission dynamics in Wuhan, China. *Nature Medicine*, 10.1038/s41591-020-0822-7.
- 40 Cereda, D., Tirani, M., Rovida, F., Demicheli, V., Ajelli, M., Poletti, P., Trentini, F., Guzzetta, G., Marziano, V., Barone, A., Magoni, M., Deandrea, S., Diurno, G., Lombardo, M., Faccini, M., Pan, A., Bruno, R., Pariani, E., Grasselli, G., Piatti, A., Gramegna, M., Baldanti, F., Melegaro, A. & Merler, S. 2020. The early phase of the COVID-19 outbreak in Lombardy, Italy. *arXiv e-prints*, 2003.09320.
- 41 Xia, Y., Jin, R., Zhao, J., Li, W. & Shen, H. 2020. Risk of COVID-19 for cancer patients. *The Lancet Oncology*, 10.1016/S1470-2045(20)30150-9.
- 42 Stier, A. J., Berman, M. G. & Bettencourt, L. M. A. 2020. COVID-19 attack rate increases with city size. *arXiv:2003.10376 [q-bio.PE]*.
- 43 Arenas, A., Cota, W., Gomez-Gardenes, J., Gómez, S., Granell, C., Matamalas, J. T., Soriano-Panos, D. & Steinegger, B. 2020. A mathematical model for the spatiotemporal epidemic spreading of COVID19. *medRxiv*, 10.1101/2020.03.21.20040022.
- 44 Bogoch, I. I., Watts, A., Thomas-Bachli, A., Huber, C., Kraemer, M. U. G. & Khan, K. 2020. Potential for global spread of a novel coronavirus from China. *Journal of Travel Medicine*, 27, 10.1093/jtm/taaa011.
- 45 De Salazar, P. M., Niehus, R., Taylor, A., Buckee, C. O. & Lipsitch, M. 2020. Using predicted imports of 2019-nCoV cases to determine locations that may not be identifying all imported cases. *medRxiv*, 10.1101/2020.02.04.20020495.
- 46 Soriano-Paños, D., Arias-Castro, J. H., Reyna-Lara, A., Martínez, H. J., Meloni, S. & Gómez-Gardeñes, J. 2020. Vector-borne epidemics driven by human mobility. *Physical Review Research*, 2, 013312, 10.1103/PhysRevResearch.2.013312.
- 47 Conticini, E., Frediani, B. & Caro, D. 2020. Can atmospheric pollution be considered a co-factor in extremely high level of SARS-CoV-2 lethality in Northern Italy? *Environmental Pollution*, 114465, <https://doi.org/10.1016/j.envpol.2020.114465>.
- 48 Loli Piccolomini, E. & Zama, F. 2020. Preliminary analysis of COVID-19 spread in Italy with an adaptive SEIRD model. In: *arXiv e-prints*, pp. arXiv:2003.09909
- 49 Yao, Y., Pan, J., Liu, Z., Meng, X., Wang, W., Kan, H. & Wang, W. 2020. Ambient nitrogen dioxide pollution and spread ability of COVID-19 in Chinese cities. *medRxiv*, 10.1101/2020.03.31.20048595.
- 50 Wang, B., Liu, J., Fu, S., Xu, X., Li, L., Ma, Y., Zhou, J., Yao, J., Liu, X., Zhang, X., He, X., Yan, J., Shi, Y., Ren, X., Niu, J., Luo, B. & zhang, K. 2020. An effect assessment of Airborne particulate matter pollution on COVID-19: A multi-city Study in China. *medRxiv*, 2020.2004.2009.20060137, 10.1101/2020.04.09.20060137.
- 51 Yao, Y., Pan, J., Wang, W., Liu, Z., Kan, H., Meng, X. & Wang, W. 2020. Spatial Correlation of Particulate Matter Pollution and Death Rate of COVID-19. *medRxiv*, 10.1101/2020.04.07.20052142.
- 52 Wu, X., Nethery, R. C., Sabath, B. M., Braun, D. & Dominici, F. 2020. Exposure to air

- pollution and COVID-19 mortality in the United States. *medRxiv*, 10.1101/2020.04.05.20054502.
- 53 EEA. 2019. European Environment Agency - Air quality in Europe - 2018. Access date, <http://www.eea.europa.eu/publications/air-quality-in-europe-2018/>.
- 54 Pluchino, A., Inturri, G., Rapisarda, A., Biondo, A. E., Le Moli, R., Zappala', C., Giuffrida, N., Russo, G. & Latora, V. 2020. A Novel Methodology for Epidemic Risk Assessment: the case of COVID-19 outbreak in Italy. In: *arXiv e-prints*, pp. 2004.02739
- 55 Grubaugh, N. D., Petrone, M. E. & Holmes, E. C. 2020. We shouldn't worry when a virus mutates during disease outbreaks. *Nature Microbiology*, 10.1038/s41564-020-0690-4.
- 56 Vallero, D. A. 2014. *Fundamentals of air pollution*: Academic press
- 57 Ficetola, G. F. & Rubolini, D. 2020. Climate affects global patterns of COVID-19 early outbreak dynamics. *medRxiv*, 10.1101/2020.03.23.20040501.
- 58 Andersen, K. G., Rambaut, A., Lipkin, W. I., Holmes, E. C. & Garry, R. F. 2020. The proximal origin of SARS-CoV-2. *Nature Medicine*, 10.1038/s41591-020-0820-9.
- 59 Giovanetti, M., Angeletti, S., Benvenuto, D. & Ciccozzi, M. 2020. A doubt of multiple introduction of SARS-CoV-2 in Italy: a preliminary overview. *J Med Virol*, n/a, 10.1002/jmv.25773.
- 60 Qiao, L., Lau, S.-f. & Mudie, L. 2020. Estimates show Wuhan death toll far higher than official figure. Access date: 30/03/2020, <https://www.rfa.org/english/news/china/wuhan-deaths-03272020182846.html>.
- 61 Burke, M. 2020. COVID-19 reduces economic activity, which reduces pollution, which saves lives. Access date: 29/03/2020, <http://www.g-feed.com/2020/03/covid-19-reduces-economic-activity.html>.
- 62 ESA. 2020. European Space Agency - Coronavirus lockdown leading to drop in pollution across Europe. Access date: 29/03/2020, [https://www.esa.int/Applications/Observing\\_the\\_Earth/Copernicus/Sentinel-5P/Coronavirus\\_lockdown\\_leading\\_to\\_drop\\_in\\_pollution\\_across\\_Europe](https://www.esa.int/Applications/Observing_the_Earth/Copernicus/Sentinel-5P/Coronavirus_lockdown_leading_to_drop_in_pollution_across_Europe).
- 63 ESA. 2020. European Space Agency - COVID-19: nitrogen dioxide over China. Access date: 29/03/2020, <https://earth.esa.int/web/guest/content/-/article/covid-19-nitrogen-dioxide-over-china>.
- 64 ARPAV. 2020. Inquinamento dell'aria in Veneto. Perche' la riduzione del traffico per l'emergenza COVID non incide sulle polveri. Access date: 29/03/2020, <https://www.arpa.veneto.it/arpavinforma/comunicati-stampa/archivio/comunicati-2020/inquinamento-dellaria-in-veneto.-perche-la-riduzione-del-traffico-per-12019emergenza-covid-non-incide-sulle-polveri>.
- 65 Wang, P., Chen, K., Zhu, S., Wang, P. & Zhang, H. 2020. Severe air pollution events not avoided by reduced anthropogenic activities during COVID-19 outbreak. *Resources, Conservation and Recycling*, 158, 104814, 10.1016/j.resconrec.2020.104814.
- 66 Poland, G. A. 2020. SARS-CoV-2: a time for clear and immediate action. *The Lancet Infectious Diseases*, 10.1016/S1473-3099(20)30250-4.
- 67 Keesing, F., Belden, L. K., Daszak, P., Dobson, A., Harvell, C. D., Holt, R. D., Hudson, P., Jolles, A., Jones, K. E., Mitchell, C. E., Myers, S. S., Bogich, T. & Ostfeld, R. S. 2010. Impacts of biodiversity on the emergence and transmission of infectious diseases. *Nature*, 468, 647-652, 10.1038/nature09575.
- 68 Bedford, J., Farrar, J., Ihekweazu, C., Kang, G., Koopmans, M. & Nkengasong, J. 2019. A new twenty-first century science for effective epidemic response. *Nature*, 575, 130-136, 10.1038/s41586-019-1717-y.

## Competing Interests

The authors declare no competing interests.

# **Higher virulence of COVID-19 in the air-polluted regions of seven severely affected countries**

Pansini R. & Fornacca D.

[r.pansini@gmail.com](mailto:r.pansini@gmail.com) & [fornacca@eastern-himalaya.cn](mailto:fornacca@eastern-himalaya.cn)

## **Supporting information**

### **Supplement to Introduction**

Several **risk factors** have been implicated with the fast spread of the virus, including super spread events<sup>1,2</sup>. Its further spread to different countries has been attributed to air travellers<sup>3-11</sup>. A number of personal risk factors have further been implicated with higher morbidity and mortality rates of Covid-19, including male gender and smoking status. In particular, smoking has been associated with a higher morbidity and mortality of COVID-19 in men than in women<sup>12</sup>.

The temperate-climate **latitudes** have been identified as the probable areas to be mostly affected by COVID-19<sup>13</sup> due to a limited exposure to UV light in winter. The sole temperature<sup>14,15</sup> or humidity<sup>16</sup> appear to play less of a role. Indeed, other human coronaviruses (HCoV-229E, HCoV-HKU1, HCoV-NL63, and HCoV-OC43) appear between December and April, and are undetectable in summer months in temperate regions, leading to winter seasonality behaviour.

The very **first appearance** of the virus cannot be directly correlated with one of these predictors, since, like the other SARS coronaviruses, SARS-CoV-2 is alleged to have transferred host from the originating bats to humans<sup>17</sup>. However, it still appeared in a Chinese area affected by some of the highest air pollution in the world, and it showed a relatively high virulence there.

### **Supplement to Methods**

We selected the eight countries according to the following elements. China (including Taiwan, Hong Kong and Macau) was chosen because of its large size and now advanced stage of its epidemic, well into the recovery phase. The second choice was Italy, at the time of writing among the most

heavily affected countries of the world, and just passed the peak of contagion. The area with the largest number of infections and deaths in Italy is the Po Valley, which is also the foremost place of polluted air in Europe<sup>18</sup>. The third country investigated was the conterminous United States, which currently has the highest number of cases worldwide, yet is still behind in the pandemic curve due to its later arrival as compared to Asia and Europe. Among the countries where the virus spread earlier, we included Iran which heavily suffers from severe air pollution due to ubiquitous use of gas methane, refineries and heavy traffic. France and Spain were selected because of the high COVID-19 figures, but minor air pollution issues than Italy. Lastly, and the United Kingdom represented suitable candidates to feed into the analysis, because of the relatively reduced containment measures adopted by those states<sup>19</sup>.

For Iran, the state made public the data of infections at a first level resolution only, until 22 March 2020. The Chinese dataset includes the 17 April update on a 50% increase in deaths in Wuhan city<sup>20</sup>. Fatalities in Italy were available only at the regional level, therefore two different datasets were compiled. The autonomous communities of Catalonia and Galicia in Spain provided figures only at the first administration level<sup>21</sup>, so we considered them at the same level as provinces. For France, information about COVID-19 deaths was available only at the department level. Finally, in the U.K., the data for Scotland was organized following the National Health Service (NHS) subdivisions.

Global Annual PM 2.5, Grids from MODIS, MISR and SeaWiFS Aerosol Optical Depth (AOD) with GWR, v1 (1998–2016), were obtained from NASA's Socioeconomic Data and Applications Center<sup>22,23</sup>. From the same repository, we retrieved the Global 3-Year Running Mean, Ground-Level NO<sub>2</sub> Grids from GOME, SCIAMACHY and GOME-2, v1 (1996–2012)<sup>22,23</sup>.

For both products, the annual grids were first reduced to an average multi-year image and afterwards, the mean of all grid cells covering every administrative unit was calculated.

The latest available annual means of measured PM 2.5 and PM 10 values were retrieved from the World Health Organization Global Ambient Air Quality Database of 2018<sup>24</sup> and used for the Italian case study because of extensive coverage. For China, we used aggregated monthly air quality

data for the years 2014 to 2016, made available by the Center for Geographic Analysis Dataverse of the University of Harvard<sup>25</sup>. For the conterminous U.S.A., summary data on several pollutants for the year 2019 was retrieved from the United States Environmental Protection Agency<sup>26</sup>. To every administrative unit, we assigned the air quality value from its related station. If more than one point fell within a given unit, the mean was calculated. No ground measures for the other countries were included in our study.

|                   | Measuring Unit   | Time period                                            | Format                                | Source                                                                                                                                                                                                                                                                                                                                                                                                                    |
|-------------------|------------------|--------------------------------------------------------|---------------------------------------|---------------------------------------------------------------------------------------------------------------------------------------------------------------------------------------------------------------------------------------------------------------------------------------------------------------------------------------------------------------------------------------------------------------------------|
| <b>COVID-19</b>   |                  |                                                        |                                       |                                                                                                                                                                                                                                                                                                                                                                                                                           |
| China             | Cases, deaths    | Until 8 Apr 2020                                       | Tabular<br>Prefecture level           | DXY - DX Doctor:<br><a href="http://ncov.dxy.cn/ncovh5/view/en_pneumonia">http://ncov.dxy.cn/ncovh5/view/en_pneumonia</a><br>Chinese government health commission                                                                                                                                                                                                                                                         |
| Italy             | Cases, deaths    | Until 10 Apr 2020                                      | Tabular<br>Province and region levels | Github repository :<br><a href="https://github.com/pcm-dpc/COVID-19">https://github.com/pcm-dpc/COVID-19</a><br>Dipartimento della Protezione Civile:<br><a href="http://www.protezionecivile.it/">http://www.protezionecivile.it/</a>                                                                                                                                                                                    |
| U.S.A.            | Cases, deaths    | Until 7 Apr 2020                                       | Tabular<br>County level               | The New York Times Github repository:<br><a href="https://github.com/nytimes/covid-19-data">https://github.com/nytimes/covid-19-data</a>                                                                                                                                                                                                                                                                                  |
| Iran              | Cases            | Until 22 Mar 2020                                      | Tabular<br>Province level             | IRNA–The Islamic Republic News Agency:<br><a href="https://en.irna.ir/photo/83723991/Iran-s-coronavirus-toll-update-March-22-2020">https://en.irna.ir/photo/83723991/Iran-s-coronavirus-toll-update-March-22-2020</a>                                                                                                                                                                                                     |
| France            | Deaths           | Until 7 Apr 2020                                       | Tabular<br>Department level           | Open Data Platform of the French Government:<br><a href="https://www.data.gouv.fr/fr/datasets/chiffres-cles-concernant-lepidemie-de-covid19-en-france/#">https://www.data.gouv.fr/fr/datasets/chiffres-cles-concernant-lepidemie-de-covid19-en-france/#</a>                                                                                                                                                               |
| Spain             | Cases, Deaths    | Until 9 Apr 2020                                       | Tabular<br>Province level             | Spanish Ministry of Health (on RTVE):<br><a href="https://www.rtve.es/noticias/20200415/mapa-del-coronavirus-espana/2004681.shtml">https://www.rtve.es/noticias/20200415/mapa-del-coronavirus-espana/2004681.shtml</a>                                                                                                                                                                                                    |
| Germany           | Cases, Deaths    | Until 11 Apr 2020                                      | Tabular<br>District level             | Robert Koch Institut:<br><a href="https://www.rki.de/EN/Home/homepage_node.html">https://www.rki.de/EN/Home/homepage_node.html</a>                                                                                                                                                                                                                                                                                        |
| U.K.              | Cases, Deaths    | Until ca. 21 Apr 2020 (cases)<br>12 Apr. 2020 (deaths) | Tabular<br>County / NHS level         | Several government sources:<br><a href="https://coronavirus.data.gov.uk/">https://coronavirus.data.gov.uk/</a> ,<br><a href="https://www.ons.gov.uk/">https://www.ons.gov.uk/</a> , <a href="https://www.gov.scot/">https://www.gov.scot/</a> ,<br><a href="https://www.nrscotland.gov.uk/">https://www.nrscotland.gov.uk/</a> ,<br><a href="https://www.publichealth.hscni.net/">https://www.publichealth.hscni.net/</a> |
| <b>Population</b> |                  |                                                        |                                       |                                                                                                                                                                                                                                                                                                                                                                                                                           |
| China             |                  | Estimates 2017                                         | Tabular<br>Prefecture level           | <a href="https://www.citypopulation.de/">https://www.citypopulation.de/</a><br>Data from Province Governments                                                                                                                                                                                                                                                                                                             |
| Italy             |                  | 2019                                                   | Tabular<br>Province level             | Istat – Italian National Institute of Statistics<br><a href="http://dati.istat.it/">http://dati.istat.it/</a>                                                                                                                                                                                                                                                                                                             |
| U.S.A.            |                  | Estimates 2018                                         | Tabular<br>County level               | U.S. Census Bureau (on ESRI ArcGIS):<br><a href="https://www.arcgis.com/home/item.html?id=a00d6b6149b34ed3b833e10fb72ef47b">https://www.arcgis.com/home/item.html?id=a00d6b6149b34ed3b833e10fb72ef47b</a>                                                                                                                                                                                                                 |
| Iran              | No. of residents | 2016                                                   | Tabular<br>Province level             | Statistical Center of Iran:<br><a href="https://www.amar.org.ir/">https://www.amar.org.ir/</a>                                                                                                                                                                                                                                                                                                                            |
| France            |                  | Estimates 2020                                         | Tabular<br>Department level           | Insee - French National Institute of Statistics:<br><a href="https://www.insee.fr/">https://www.insee.fr/</a>                                                                                                                                                                                                                                                                                                             |
| Spain             |                  | 2019                                                   | Tabular<br>Province level             | INE – Spanish National Institute of Statistics:<br><a href="https://www.ine.es/en/index.htm">https://www.ine.es/en/index.htm</a>                                                                                                                                                                                                                                                                                          |
| Germany           |                  | Estimates 2018                                         | Tabular<br>District level             | Database of the Federal Statistic Office:<br><a href="https://www-genesis.destatis.de/">https://www-genesis.destatis.de/</a>                                                                                                                                                                                                                                                                                              |

|                                                                           |                               |                                           |                                    |                                                                                                                                                                                                  |
|---------------------------------------------------------------------------|-------------------------------|-------------------------------------------|------------------------------------|--------------------------------------------------------------------------------------------------------------------------------------------------------------------------------------------------|
| <b>U.K.</b>                                                               |                               | Estimates<br>2018                         | Tabular<br>County level            | U.K. Office of National Statistics<br><a href="https://www.ons.gov.uk/">https://www.ons.gov.uk/</a>                                                                                              |
| <b>Air Quality (ground measures)</b>                                      |                               |                                           |                                    |                                                                                                                                                                                                  |
| <b>China</b>                                                              |                               |                                           |                                    | University of Harvard Dataverse:<br><a href="https://dataverse.harvard.edu">https://dataverse.harvard.edu</a><br>Data from <a href="http://aqicn.org">http://aqicn.org</a>                       |
| PM 2.5, PM 10,<br>O <sub>3</sub> , NO <sub>2</sub> , SO <sub>2</sub> , CO | AQI                           | 2014                                      | Tabular<br>GPS points              |                                                                                                                                                                                                  |
| <b>Italy</b>                                                              |                               |                                           |                                    | Ambient Air Quality Database, WHO, April 2018<br><a href="https://www.who.int/airpollution/data/cities/en/">https://www.who.int/airpollution/data/cities/en/</a>                                 |
| PM 2.5, PM 10                                                             | µg/m <sup>3</sup>             | Annual<br>2013-2016                       | Tabular<br>Location name           |                                                                                                                                                                                                  |
| <b>U.S.A.</b>                                                             |                               |                                           |                                    | EPA – United States Environmental Protection Agency<br><a href="https://www.epa.gov/outdoor-air-quality-data">https://www.epa.gov/outdoor-air-quality-data</a>                                   |
| PM 2.5, PM 10,<br>O <sub>3</sub> , NO <sub>2</sub> , SO <sub>2</sub> , CO | µg/m <sup>3</sup><br>ppm, ppb | 2019                                      | Tabular<br>GPS points              |                                                                                                                                                                                                  |
| <b>Air Quality (satellite)</b>                                            |                               |                                           |                                    |                                                                                                                                                                                                  |
| PM 2.5                                                                    | µg/m <sup>3</sup>             | Annual<br>1998-2016                       | Continuous grid<br>(0.01 arc deg.) | Global Annual PM 2.5 Grids from MODIS, MISR and SeaWiFS Aerosol Optical Depth (AOD) with GWR, v1<br><a href="https://doi.org/10.7927/H4ZK5DQS">https://doi.org/10.7927/H4ZK5DQS</a>              |
| NO <sub>2</sub>                                                           | ppb                           | 3-year<br>running<br>means<br>(1996-2012) | Continuous grid<br>(0.1 arc deg.)  | Global 3-Year Running Mean Ground-Level NO <sub>2</sub> Grids from GOME, SCIAMACHY and GOME-2, v1 (1996–2012)<br><a href="https://doi.org/10.7927/H4JW8BTT">https://doi.org/10.7927/H4JW8BTT</a> |

Table S1 Information on the datasets used for the viral and pollution analyses.



## Supplement to Results

|                   | variable            | unit  | count | mean   | std   | min   | 25%   | 50%    | 75%    | max    | range  | iqr   |
|-------------------|---------------------|-------|-------|--------|-------|-------|-------|--------|--------|--------|--------|-------|
| China             | PM 2.5 sat          | ug/m3 | 347   | 30.31  | 15.80 | 2.08  | 19.11 | 29.09  | 40.01  | 70.98  | 68.90  | 20.89 |
|                   | NO <sub>2</sub> sat | ppb   | 347   | 1.96   | 1.96  | 0.06  | 0.54  | 1.26   | 3.06   | 13.75  | 13.69  | 2.52  |
|                   | PM 2.5 gr           | AQI   | 308   | 110.78 | 27.79 | 38.20 | 92.63 | 111.55 | 128.51 | 186.96 | 148.76 | 35.88 |
|                   | PM 10 gr            | AQI   | 308   | 63.61  | 22.98 | 19.96 | 46.26 | 60.90  | 75.67  | 170.27 | 150.31 | 29.40 |
|                   | CO gr               | AQI   | 308   | 9.71   | 3.97  | 2.39  | 7.11  | 8.74   | 11.85  | 27.01  | 24.63  | 4.74  |
|                   | NO <sub>2</sub> gr  | AQI   | 308   | 13.72  | 5.40  | 3.17  | 9.63  | 13.40  | 17.41  | 28.57  | 25.40  | 7.78  |
|                   | O <sub>3</sub> gr   | AQI   | 308   | 25.83  | 5.87  | 14.22 | 21.70 | 25.17  | 28.98  | 50.54  | 36.31  | 7.28  |
|                   | SO <sub>2</sub> gr  | AQI   | 308   | 13.24  | 7.96  | 1.14  | 7.88  | 10.97  | 16.46  | 40.58  | 39.44  | 8.58  |
| U.S.A.            | PM 2.5 sat          | ug/m3 | 3104  | 9.37   | 2.68  | 2.32  | 7.26  | 9.68   | 11.54  | 15.57  | 13.24  | 4.28  |
|                   | NO <sub>2</sub> sat | ppb   | 3103  | 1.59   | 1.25  | 0.17  | 0.73  | 1.20   | 2.13   | 14.97  | 14.80  | 1.40  |
|                   | PM 2.5 gr           | ug/m3 | 429   | 7.22   | 2.10  | 0.00  | 5.88  | 7.37   | 8.66   | 15.73  | 15.73  | 2.78  |
|                   | PM 10 gr            | ug/m3 | 203   | 16.09  | 6.36  | 4.60  | 12.41 | 15.43  | 18.62  | 40.64  | 36.04  | 6.21  |
|                   | CO gr               | ppm   | 158   | 0.25   | 0.10  | 0.04  | 0.19  | 0.25   | 0.30   | 0.82   | 0.78   | 0.12  |
|                   | NO <sub>2</sub> gr  | ppb   | 248   | 14.63  | 7.93  | 1.08  | 7.88  | 14.50  | 20.65  | 36.73  | 35.65  | 12.76 |
|                   | O <sub>3</sub> gr   | ppm   | 751   | 0.05   | 0.00  | 0.03  | 0.04  | 0.05   | 0.05   | 0.06   | 0.03   | 0.00  |
|                   | SO <sub>2</sub> gr  | ppb   | 316   | 2.61   | 5.56  | -0.38 | 0.57  | 1.30   | 2.51   | 75.47  | 75.85  | 1.94  |
| Italy (provinces) | PM 2.5 sat          | ug/m3 | 107   | 12.82  | 6.08  | 4.50  | 7.68  | 11.62  | 18.10  | 25.37  | 20.86  | 10.42 |
|                   | NO <sub>2</sub> sat | ppb   | 107   | 2.67   | 2.42  | 0.39  | 0.99  | 1.61   | 3.95   | 11.56  | 11.16  | 2.96  |
|                   | PM 2.5 gr           | ug/m3 | 90    | 16.37  | 4.89  | 6.00  | 13.00 | 15.37  | 19.46  | 29.00  | 23.00  | 6.46  |
|                   | PM 10 gr            | ug/m3 | 101   | 23.67  | 5.61  | 13.67 | 19.75 | 22.50  | 26.75  | 41.00  | 27.33  | 7.00  |
| Italy (regions)   | PM 2.5 sat          | ug/m3 | 21    | 11.29  | 4.73  | 4.90  | 7.73  | 10.48  | 13.84  | 20.59  | 15.69  | 6.11  |
|                   | NO <sub>2</sub> sat | ppb   | 21    | 1.93   | 1.68  | 0.48  | 0.83  | 1.35   | 2.25   | 7.08   | 6.59   | 1.42  |
|                   | PM 2.5 gr           | ug/m3 | 19    | 15.19  | 3.50  | 9.50  | 13.00 | 14.67  | 16.05  | 22.96  | 13.46  | 3.05  |
|                   | PM 10 gr            | ug/m3 | 21    | 22.15  | 4.40  | 15.60 | 20.40 | 21.29  | 22.92  | 34.67  | 19.07  | 2.52  |
| Iran              | PM 2.5 sat          | ug/m3 | 31    | 10.97  | 3.07  | 5.89  | 8.74  | 10.47  | 13.74  | 16.43  | 10.54  | 5.00  |
|                   | NO <sub>2</sub> sat | ppb   | 31    | 0.47   | 0.47  | 0.10  | 0.22  | 0.31   | 0.42   | 2.24   | 2.14   | 0.21  |
| France            | PM 2.5 sat          | ug/m3 | 96    | 10.23  | 2.42  | 6.22  | 8.13  | 9.90   | 11.79  | 16.49  | 10.27  | 3.66  |
|                   | NO <sub>2</sub> sat | ppb   | 96    | 2.37   | 1.75  | 0.55  | 1.20  | 1.80   | 3.02   | 8.79   | 8.24   | 1.82  |
| Spain             | PM 2.5 sat          | ug/m3 | 46    | 7.00   | 1.32  | 2.29  | 6.48  | 6.94   | 7.62   | 10.10  | 7.81   | 1.14  |
|                   | NO <sub>2</sub> sat | ppb   | 46    | 1.02   | 0.47  | 0.09  | 0.69  | 0.92   | 1.28   | 2.69   | 2.59   | 0.59  |
| Germany           | PM 2.5 sat          | ug/m3 | 401   | 13.95  | 1.53  | 8.91  | 13.10 | 13.86  | 14.93  | 18.47  | 9.56   | 1.83  |
|                   | NO <sub>2</sub> sat | ppb   | 401   | 4.77   | 2.04  | 1.48  | 3.48  | 4.19   | 5.24   | 11.86  | 10.38  | 1.76  |
| U.K.              | PM 2.5 sat          | ug/m3 | 198   | 10.04  | 3.08  | 2.16  | 8.31  | 10.57  | 12.02  | 15.03  | 12.88  | 3.71  |
|                   | NO <sub>2</sub> sat | ppb   | 196   | 5.43   | 2.60  | 0.48  | 3.52  | 5.22   | 6.82   | 10.23  | 9.76   | 3.29  |

Table S2 Descriptive statistics for the air pollution variables in the eight countries.

Pansini & Fornacca 2020

|                     | China |            |              | U.S.A. |            |              | Italy (provinces) |            |       | Italy (regions) |            |              |
|---------------------|-------|------------|--------------|--------|------------|--------------|-------------------|------------|-------|-----------------|------------|--------------|
|                     | df    | <i>p</i> - |              | df     | <i>p</i> - |              | df                | <i>p</i> - |       | df              | <i>p</i> - |              |
|                     | (N-2) | tau        | value        | (N-2)  | tau        | value        | (N-2)             | tau        | value | (N-2)           | tau        | value        |
| PM 2.5 sat          | 345   | .58        | <.001        | 3102   | .38        | <.001        | 105               | .27        | <.001 | 19              | .30        | 0.065        |
| NO <sub>2</sub> sat | 345   | .63        | <.001        | 3101   | .54        | <.001        | 105               | .36        | <.001 | 19              | .42        | <b>0.007</b> |
| PM 2.5 gr           | 306   | .34        | <.001        | 427    | .33        | <.001        | 88                | .31        | <.001 | 17              | .45        | <b>0.008</b> |
| PM 10 gr            | 306   | .21        | <.001        | 201    | .27        | <.001        | 99                | .38        | <.001 | 19              | .69        | <.001        |
| CO gr               | 306   | .09        | <b>0.022</b> | 156    | .40        | <.001        |                   |            |       |                 |            |              |
| NO <sub>2</sub> gr  | 306   | .37        | <.001        | 246    | .52        | <.001        |                   |            |       |                 |            |              |
| O <sub>3</sub> gr   | 306   | .13        | <.001        | 749    | .01        | 0.824        |                   |            |       |                 |            |              |
| SO <sub>2</sub> gr  | 306   | .15        | <.001        | 314    | -.09       | <b>0.016</b> |                   |            |       |                 |            |              |

|                     | Iran  |            |       | France |            |       | Spain |            |              | Germany |            |       | U.K.  |            |       |
|---------------------|-------|------------|-------|--------|------------|-------|-------|------------|--------------|---------|------------|-------|-------|------------|-------|
|                     | df    | <i>p</i> - |       | df     | <i>p</i> - |       | df    | <i>p</i> - |              | df      | <i>p</i> - |       | df    | <i>p</i> - |       |
|                     | (N-2) | tau        | value | (N-2)  | tau        | value | (N-2) | tau        | value        | (N-2)   | Tau        | value | (N-2) | tau        | value |
| PM 2.5 sat          | 29    | .56        | <.001 | 94     | .34        | <.001 | 44    | .41        | <.001        | 399     | .14        | <.001 | 196   | .56        | <.001 |
| NO <sub>2</sub> sat | 29    | .56        | <.001 | 94     | .44        | <.001 | 44    | .24        | <b>0.019</b> | 399     | .40        | <.001 | 194   | .53        | <.001 |

Table S3 Correlation coefficients between population density and air pollution variables in eight countries. Significant correlations ( $p$ -value < 0.05) are shown in bold; blue and red colour highlights indicate positive and negative correlations, respectively.

## Supplement to Discussion

The possibly large proportion of **asymptomatic cases** has been implied as an important factor in the fast spread of the virus and will necessarily lead to a biased mortality rate. Different government policies with regards to testing have led to vastly different estimates across countries<sup>27,10</sup>, and a COVID-19 overall mortality rate has not been established yet. Asymptomatic cases could be as high as about 50% of total cases, as estimated by simulations<sup>28</sup>.

States have responded by trying to mitigate the spread of the virus through imposing widespread lockdowns. This has led to a **decrease in air pollution**, which in China likely prevented the deaths of 4,000 children under 5 and 73,000 adults over 70<sup>29</sup>. However, the winter months and low temperature caused people to keep at least domestic heating systems on, maintaining a certain amount of emissions. In Europe<sup>30</sup> and in China<sup>31</sup> a consistent reduction in air pollution was recorded by satellites due to reduced anthropogenic activities during the lockdowns, although it occurred gradually<sup>32,33</sup>, also due to weather conditions unfavourable to air quality. The quarantines certainly decreased the role that **commuting** has in the virus spread. Nonetheless, reduced anthropogenic

Pansini & Fornacca 2020

activities and reduced mobility lose correlational significance over time, after the first stages of the infection<sup>34</sup>. Instead, the correlation we found with low air quality remains significant throughout the different epidemic stages.

## References

- 1 Hu, K., Zhao, Y., Wang, M., Zeng, Q., Wang, X., Wang, M., Zheng, Z., Li, X., Zhang, Y., Wang, T., Zeng, S., Jiang, Y., Liu, D., Yu, W., Hu, F., Qin, H., Hao, J., Yuan, J., Shang, R., Jiang, M., Ding, X., Zhang, B., Shi, B. & Zhang, C. 2020. Identification of a super-spreading chain of transmission associated with COVID-19. *medRxiv*, 10.1101/2020.03.19.20026245.
- 2 Lloyd-Smith, J. O., Schreiber, S. J., Kopp, P. E. & Getz, W. M. 2005. Superspreading and the effect of individual variation on disease emergence. *Nature*, 438, 355-359.
- 3 Findlater, A. & Bogoch, I. I. 2018. Human Mobility and the Global Spread of Infectious Diseases: A Focus on Air Travel. *Trends in Parasitology*, 34, 772-783, 10.1016/j.pt.2018.07.004.
- 4 Hoehl, S., Rabenau, H., Berger, A., Kortenbusch, M., Cinatl, J., Bojkova, D., Behrens, P., Böddinghaus, B., Götsch, U., Naujoks, F., Neumann, P., Schork, J., Tiarks-Jungk, P., Walczok, A., Eickmann, M., Vehreschild, M. J. G. T., Kann, G., Wolf, T., Gottschalk, R. & Ciesek, S. 2020. Evidence of SARS-CoV-2 Infection in Returning Travelers from Wuhan, China. *New England Journal of Medicine*, 382, 1278-1280, 10.1056/NEJMc2001899.
- 5 Jung, S.-m., Akhmetzhanov, A. R., Hayashi, K., Linton, N. M., Yang, Y., Yuan, B., Kobayashi, T., Kinoshita, R. & Nishiura, H. 2020. Real-time estimation of the risk of death from novel coronavirus (COVID-19) infection: Inference using exported cases. *Journal of clinical medicine*, 9, 523, 10.3390/jcm9020523.
- 6 McCloskey, B. & Heymann, D. L. 2020. SARS to novel coronavirus - old lessons and new lessons. *Epidemiology and infection*, 148, e22-e22, 10.1017/S0950268820000254.
- 7 Ng, O.-T., Marimuthu, K., Chia, P.-Y., Koh, V., Chiew, C. J., De Wang, L., Young, B. E., Chan, M., Vasoo, S., Ling, L.-M., Lye, D. C., Kam, K.-q., Thoon, K.-C., Kurupatham, L., Said, Z., Goh, E., Low, C., Lim, S.-K., Raj, P., Oh, O., Koh, V. T. J., Poh, C., Mak, T.-M., Cui, L., Cook, A. R., Lin, R. T. P., Leo, Y.-S. & Lee, V. J. M. 2020. SARS-CoV-2 Infection among Travelers Returning from Wuhan, China. *New England Journal of Medicine*, 10.1056/NEJMc2003100.
- 8 Niehus, R., De Salazar, P. M., Taylor, A. & Lipsitch, M. 2020. Quantifying bias of COVID-19 prevalence and severity estimates in Wuhan, China that depend on reported cases in international travelers. *medRxiv*, 10.1101/2020.02.13.20022707.
- 9 Read, J. M., Bridgen, J. R., Cummings, D. A., Ho, A. & Jewell, C. P. J. m. 2020. Novel coronavirus 2019-nCoV: early estimation of epidemiological parameters and epidemic predictions.
- 10 Verity, R., Okell, L. C., Dorigatti, I., Winskill, P., Whittaker, C., Imai, N., Cuomo-Dannenburg, G., Thompson, H., Walker, P., Fu, H., Dighe, A., Griffin, J., Cori, A., Baguelin, M., Bhatia, S., Boonyasiri, A., Cucunuba, Z. M., Fitzjohn, R., Gaythorpe, K. A. M., Green, W., Hamlet, A., Hinsley, W., Laydon, D., Nedjati-Gilani, G., Riley, S., van-Elsand, S., Volz, E., Wang, H., Wang, Y., Xi, X., Donnelly, C., Ghani, A. & Ferguson, N. 2020. Estimates of the severity of COVID-19 disease. *medRxiv*, 10.1101/2020.03.09.20033357.
- 11 Wells, C. R., Sah, P., Moghadas, S. M., Pandey, A., Shoukat, A., Wang, Y., Wang, Z., Meyers, L. A., Singer, B. H. & Galvani, A. P. 2020. Impact of international travel and border control

- measures on the global spread of the novel 2019 coronavirus outbreak. *Proceedings of the National Academy of Sciences*, 117, 7504, 10.1073/pnas.2002616117.
- 12 Xia, Y., Jin, R., Zhao, J., Li, W. & Shen, H. 2020. Risk of COVID-19 for cancer patients. *The Lancet Oncology*, 10.1016/S1470-2045(20)30150-9.
- 13 Sajadi, M. M., Habibzadeh, P., Vintzileos, A., Shokouhi, S., Miralles-Wilhelm, F. & Amoroso, A. J. A. a. S. 2020. Temperature and latitude analysis to predict potential spread and seasonality for COVID-19.
- 14 Ficetola, G. F. & Rubolini, D. 2020. Climate affects global patterns of COVID-19 early outbreak dynamics. *medRxiv*, 10.1101/2020.03.23.20040501.
- 15 Lipsitch, M. 2020. Seasonality of SARS-CoV-2: Will COVID-19 go away on its own in warmer weather? Access date: 23/03/2020, <https://ccdd.hsph.harvard.edu/will-covid-19-go-away-on-its-own-in-warmer-weather/>.
- 16 Luo, W., Majumder, M. S., Liu, D., Poirier, C., Mandl, K. D., Lipsitch, M. & Santillana, M. 2020. The role of absolute humidity on transmission rates of the COVID-19 outbreak. *medRxiv*, 10.1101/2020.02.12.20022467.
- 17 Andersen, K. G., Rambaut, A., Lipkin, W. I., Holmes, E. C. & Garry, R. F. 2020. The proximal origin of SARS-CoV-2. *Nature Medicine*, 10.1038/s41591-020-0820-9.
- 18 EEA. 2019. European Environment Agency - Air quality in Europe - 2018. Access date, <http://www.eea.europa.eu/publications/air-quality-in-europe-2018/>.
- 19 Cohen, J. & Kupferschmidt, K. 2020. Countries test tactics in 'war' against COVID-19. *Science*, 367, 1287, 10.1126/science.367.6484.1287.
- 20 Xinhua. 2020. Full Text: Q&A on the Revisions to the Numbers of Confirmed Cases and Fatalities of COVID-19 in Wuhan. Access date: 17/04/2020, [http://www.xinhuanet.com/english/2020-04/17/c\\_138984721.htm](http://www.xinhuanet.com/english/2020-04/17/c_138984721.htm).
- 21 Legido-Quigley, H., Mateos-García, J. T., Campos, V. R., Gea-Sánchez, M., Muntaner, C. & McKee, M. The resilience of the Spanish health system against the COVID-19 pandemic. *The Lancet Public Health*, 10.1016/S2468-2667(20)30060-8.
- 22 van Donkelaar, A., Martin, R. V., Brauer, M., Hsu, N. C., Kahn, R. A., Levy, R. C., Lyapustin, A., Sayer, A. M. & Winker, D. M. 2016. Global Estimates of Fine Particulate Matter Using a Combined Geophysical-Statistical Method with Information from Satellites. *Environ Sci Technol*, 50, 3762, 10.1021/acs.est.5b05833.
- 23 van Donkelaar, A., Martin, R. V., Brauer, M., Hsu, N. C., Kahn, R. A., Levy, R. C., Lyapustin, A., Sayer, A. M. & Winker, D. M. 2018. Global Annual PM2.5 Grids from MODIS, MISR and SeaWiFS Aerosol Optical Depth (AOD) with GWR, 1998-2016. Access date: 10/04/2020, <https://doi.org/10.7927/H4ZK5DQS>, 10.7927/H4ZK5DQS.
- 24 WHO. 2018. WHO Global Ambient Air Quality Database (update 2018). Access date: 28/03/2020, <https://www.who.int/airpollution/data/cities/en/>.
- 25 Berman, L. 2017. China AQI Archive (Feb 2014 - Feb 2016). Access date, <https://doi.org/10.7910/DVN/GHOXXO>, doi:10.7910/DVN/GHOXXO.
- 26 EPA. 2019. Environmental Protection Agency - Air Data: Air Quality Data Collected at Outdoor Monitors Across the US. Access date, [https://aqg.epa.gov/aqsweb/airdata/download\\_files.html#Annual](https://aqg.epa.gov/aqsweb/airdata/download_files.html#Annual).
- 27 Famulare, M. 2020. 2019-nCoV: preliminary estimates of the confirmed-case-fatality-ratio and infection-fatality-ratio, and initial pandemic risk assessment. Access date: 30/02/2020, [https://instituteofdiseasemodeling.github.io/nCoV-public/analyses/first\\_adjusted\\_mortality\\_estimates\\_and\\_risk\\_assessment/2019-nCoV-preliminary\\_age\\_and\\_time\\_adjusted\\_mortality\\_rates\\_and\\_pandemic\\_risk\\_assessment.html](https://instituteofdiseasemodeling.github.io/nCoV-public/analyses/first_adjusted_mortality_estimates_and_risk_assessment/2019-nCoV-preliminary_age_and_time_adjusted_mortality_rates_and_pandemic_risk_assessment.html).
- 28 Li, R., Pei, S., Chen, B., Song, Y., Zhang, T., Yang, W. & Shaman, J. 2020. Substantial undocumented infection facilitates the rapid dissemination of novel coronavirus (SARS-CoV2). *Science*, eabb3221, 10.1126/science.abb3221.
- 29 Burke, M. 2020. COVID-19 reduces economic activity, which reduces pollution, which saves

Pansini & Fornacca 2020

- lives. Access date: 29/03/2020, <http://www.g-feed.com/2020/03/covid-19-reduces-economic-activity.html>.
- 30 ESA. 2020. European Space Agency - Coronavirus lockdown leading to drop in pollution across Europe. Access date: 29/03/2020, [https://www.esa.int/Applications/Observing\\_the\\_Earth/Copernicus/Sentinel-5P/Coronavirus\\_lockdown\\_leading\\_to\\_drop\\_in\\_pollution\\_across\\_Europe](https://www.esa.int/Applications/Observing_the_Earth/Copernicus/Sentinel-5P/Coronavirus_lockdown_leading_to_drop_in_pollution_across_Europe).
- 31 ESA. 2020. European Space Agency - COVID-19: nitrogen dioxide over China. Access date: 29/03/2020, <https://earth.esa.int/web/guest/content/-/article/covid-19-nitrogen-dioxide-over-china>.
- 32 ARPAV. 2020. Inquinamento dell'aria in Veneto. Perché la riduzione del traffico per l'emergenza COVID non incide sulle polveri. Access date: 29/03/2020, <https://www.arpa.veneto.it/arpavinforma/comunicati-stampa/archivio/comunicati-2020/inquinamento-dellaria-in-veneto.-perche-la-riduzione-del-traffico-per-12019emergenza-covid-non-incide-sulle-polveri>.
- 33 Wang, P., Chen, K., Zhu, S., Wang, P. & Zhang, H. 2020. Severe air pollution events not avoided by reduced anthropogenic activities during COVID-19 outbreak. *Resources, Conservation and Recycling*, 158, 104814, 10.1016/j.resconrec.2020.104814.
- 34 Kraemer, M. U. G., Yang, C.-H., Gutierrez, B., Wu, C.-H., Klein, B., Pigott, D. M., du Plessis, L., Faria, N. R., Li, R., Hanage, W. P., Brownstein, J. S., Layan, M., Vespignani, A., Tian, H., Dye, C., Pybus, O. G. & Scarpino, S. V. 2020. The effect of human mobility and control measures on the COVID-19 epidemic in China. *Science*, eabb4218, 10.1126/science.abb4218.
